# Supplementary material for: Natural Variation of Fatty Acid Desaturase Gene Affects Linolenic Acid Content and Starch Pasting Viscosity in Rice Grains
Source: MDPI journal article supplement (doi:10.3390/ijms231912055), 2022-10-10
Supplement: s1 [file s1]

# **Natural Variation of Fatty Acid Desaturase Gene Affects Linolenic Acid Content and Starch Pasting Viscosity in Rice Grains**

Liting Zhang <sup>1,2</sup>, Yu Xia <sup>1,2</sup>, Yage Dong <sup>1,3</sup>, Tianyi Xie <sup>1,2</sup>, Wenqiang Sun <sup>1,3</sup>, and Sijin Yu <sup>1,2,4,\*</sup>

<sup>1</sup> National Key Laboratory of Crop Genetic Improvement, Huazhong Agricultural University, Wuhan 430070, China

<sup>2</sup> College of Plant Science and Technology, Huazhong Agricultural University, Wuhan 430070, China

<sup>3</sup> College of Life Science and Technology, Huazhong Agricultural University, Wuhan 430070, China

<sup>4</sup> Hubei Hongshan Laboratory, Wuhan 430070, China

\* Correspondence: ysb@mail.hzau.edu.cn

## Supplementary Figures S1-S3

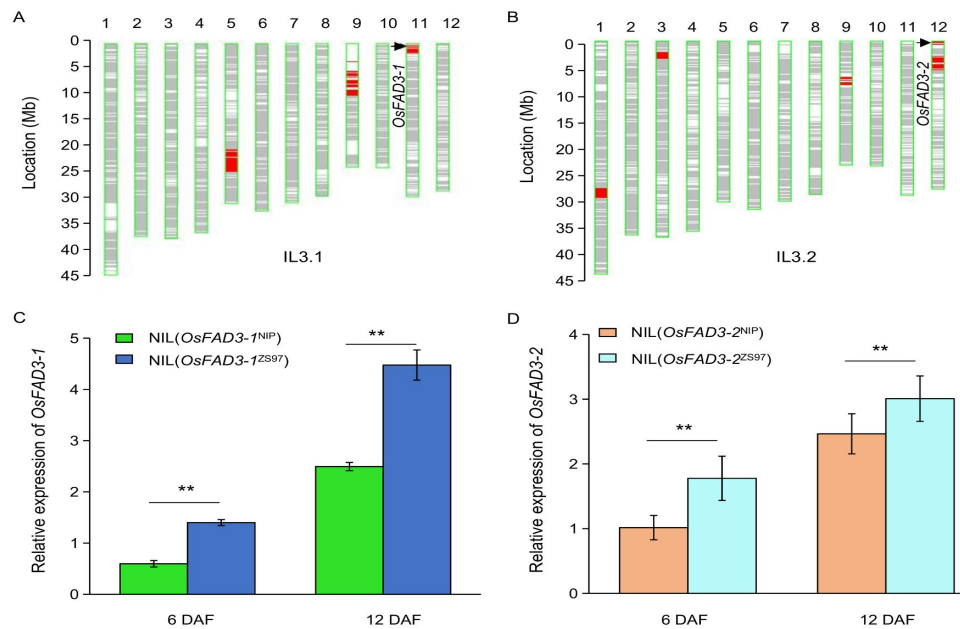

**Figure S1.** Graphic genotype of IL3.1 and IL3.2 and expression analyses of *OsFAD3-1* and *OsFAD3-2* in the spikelets of the near-isogenic lines (NIL). (A, B) Graphic genotype of IL3.1 and IL3.2. (C, D) Expression analyses of *OsFAD3-1* and *OsFAD3-2* in the spikelets of 6 DAF and 12 DAF (day after flowering). The *Ubiquitin* as an internal reference. Values are means  $\pm$  SD (n = 3 replications). Significance is indicated by *t*-test. \*\*, P < 0.01.

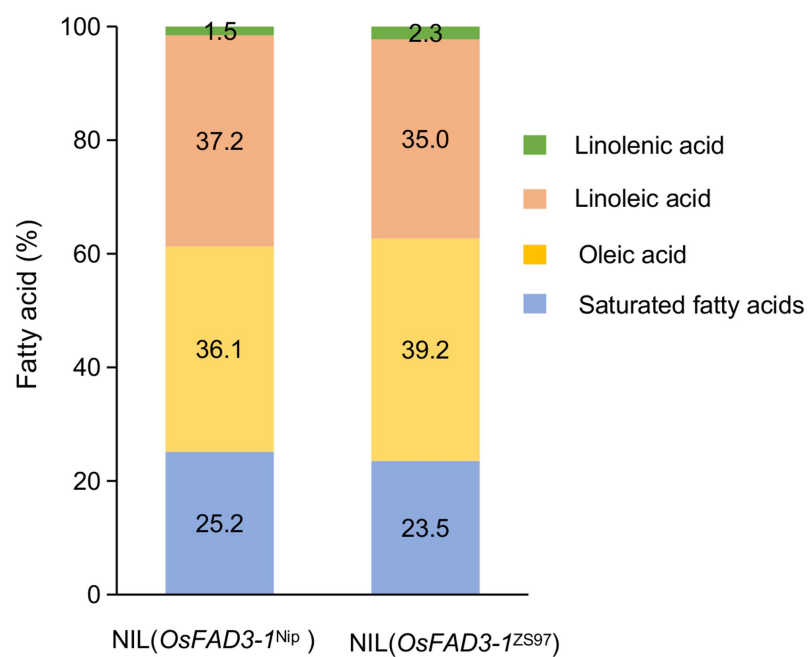

**Figure S2.** Relative contents of fatty acid compositions in the embryos of NIL (*OsFAD3-1<sup>Nip</sup>*) and NIL (*OsFAD3-1<sup>ZS97</sup>*).

A

Nip : GCTAGTTTTACGTATGGGGCTGGTTAGCTGTAATGCGCTACATATATGTTATTAGTATTG:-418  
 ZS97: GCTAGTTTTACGTATGGGGCTGGTTAGCTGTAATGCGCTACATATATGTTATTAGTATTG:-415

Nip : TAGGCAAATGAGTATGGAGTAGTAACAAATAGTAGTATGGATTTTGTGTAATAGAGATGG:-358  
 ZS97: TAGGCAAATGAGTATGGAGTAGTAACAAATAGTAGTATGGATTTTGTGTAATAGAGATGG:-355

Nip : AGGGAGGACGGTTTAATTGAGGAGGCAAGAGAATCCAAAAAGCATAAGCGTGTGGTGTG:-298  
 ZS97: AGGGAGGACGGTTTAATTGAGGAGGCAAGAGAATCCAAAAAGCATAAGCGTGTGGTGTG:-295

Nip : GTGATGAAATGGGAAGGAAGGAGCAGAGGAGGCCTATAAATAGGGACATAGCAAAGCAAA:-238  
 ZS97: GTGATGAAATGGGAAGGAAGGAGCAGAGGAGGCCTATAAATAGGGACATAGCAAAGCAAA:-235

Nip : GGGGGCAGGCCGCACACAGCACAGGAGGAGGAGCTTGCTTTCCTTCCTTCCTTCCTTCCT:-178  
 ZS97: GGGGGCAGGCCGCACACAACACAGGAGGAGGAGCTTGCTTTCCTTCCTTCCTTCCTTCCT:-183

Nip : GGGTTGGGTTTGGGTTTGCCTTGCAGGCCATCCATCGCATTCGCGTTCCGAGGCACAAAC:-118  
 ZS97: GGGTTGGGTTTGGGTTTGCCTTGCAGGCCATCCATCGCATTCGCGTTCCGAGGCACAAAC:-123

Nip : CAAACACCTCCCCCTCAAATTTCTCTTTCTTGTCTCTTCTCCCTTTCCGCCTCGCCTCGCT:-58  
 ZS97: CAAACACCTCCCCCTCAAATTTCTCTTTCTTGTCTCTTCTCCCTTTCCGCCTCGCCTCGCT:-63

Nip : GCCAAA-----GCTTCACAAATCACAAATCGGAATCAGATCCACCACGACACGGCGGCGG:-3  
 ZS97: TCGCTGCCTTCGCTTCACAAATCACAAATCGGAATCAGATCCACCACGACACGGCGGCGG:-3

Nip : CA:-1  
 ZS97: CA:-1

B

NIP : MAASATQEADCKASEDARLFFDAKPPPPFRIGDVRAAIPAHCWRKTPRLRSLSYVARDLLI:60  
 ZS97: MAASATQEADCKASEDARLFFDAKPPPPFRIGDVRAAIPAHCWRKTPRLRSLSYVARDLLI:60

NIP : VAALFAAAASIDLAWA--WPLYWAAQGTMEFWALFVLGHDCGHGSFSDSAMLNNVVGHL:120  
 ZS97: VAALFAAAATRIDVSVAWA--WPLYWAAQGTMEFWALFVLGHDCGHGSFSDSAMLNNVVGHL:120

NIP : LHSFILVPYHGWRISHRTHHQNHGHIERDESWHPITEKLYWQLETRTKKLRFLLPFTLLA:180  
 ZS97: LHSFILVPYHGWRISHRTHHQNHGHIERDESWHPITEKLYWQLETRTKKLRFLLPFTLLA:180

NIP : FVPYLVYRSPGKTGSHFLPSSDLFSPKEKSDVIVSTTCWCIMISLLVALACVFGPVPVLM:240  
 ZS97: FVPYLVYRSPGKTGSHFLPSSDLFSPKEKSDVIVSTTCWCIMISLLVALACVFGPVPVLM:240

NIP : LYGVPLYLVFVMWLDLVTYLHHHGHNDLPWYRGEESYLRGGLTTVDRDYGWINNIHHDIG:300  
 ZS97: LYGVPLYLVFVMWLDLVTYLHHHGHNDLPWYRGEESYLRGGLTTVDRDYGWINNIHHDIG:300

NIP : THVIHHLFPQIPHYHLVEATKAARPVLGRYYREPEKSGPLPLHLFGVLLRSLRVDHFVSD:360  
 ZS97: THVIHHLFPQIPHYHLVEATKAARPVLGRYYREPEKSGPLPLHLFGVLLRSLRVDHFVSD:360

NIP : VGDVYYYQTDHSLNGTDWAEDAKHK:385  
 ZS97: VGDVYYYQTDHSLNGTDWAEDAKHK:385

**Figure S3.** Comparison of sequence variation of *OsFAD3-1* in the varieties Nipponbare (NIP) and Zhenshan 97 (ZS97). (A) Promoter sequences, showing the 8-bp and 5-bp indels in red font letters; (B) Amino acid sequences of *OsFAD3-1*; The amino acid changes are indicated by red letters.
