# Supplementary material for: Natural Variation of Fatty Acid Desaturase Gene Affects Linolenic Acid Content and Starch Pasting Viscosity in Rice Grains
Source: Int J Mol Sci. 2022 Oct 10;23(19):12055. doi: 10.3390/ijms231912055 (PMC9570344; doi:10.3390/ijms231912055)
Supplement: Supplementary file 1 [file ijms-23-12055-s001.zip › Supplementary Tables S1-S3.xlsx]

## Sheet: S1
Table S1. One-way analysis of variance of marker effects on LA, ALA and the LA/ALA ratio in the embryos
	Trait	LA/ALA			LA			ALA
Marker	Chromosome	F	P-value		F	P-value		F	P-value
M3	11	63.16	0		1	0.371		5.94	0.003
ID0508	5	2.04	0.136		3.61	0.031		2.6	0.079
ID0904	9	0.22	0.801		2.32	0.104		1.07	0.344

## Sheet: S2
	Table S2. Rice varieties used for the effect validation
编号	Accessions	Haplotype	Marker (FA) genotype
16WYC-1	Gerdeh	H1	A
16WYC-17	9311	H1	A
16WYC-4	Zhonghua-11	H1	A
16WYC-5	Liaojing-287	H1	A
16WYC-6	Laoguangtou-83	H1	A
16WYC-7	Rubio	H1	A
16WYC-8	Domsiah	H1	A
16WYC-9	Taidongludao	H1	A
16WYC-11	CR-203	H1	A
16WYC-12	Muxiqiu	H1	A
16WYC-14	Taidongludao	H1	A
16WYC-15	Azucena	H1	A
16WYC-19	Yelicanghua	H1	A
16WYC-23	Huangkezaogan	H1	A
16WYC-30	Nipponbare	H1	A
16WYC-27	Zimi	H2	B
16WYC-28	Rusty late	H2	B
16WYC-32	Zhengshan 97	H2	B
16WYC-33	Jinzhinuo	H2	B
16WYC-34	Shanhuangzhan-2	H2	B
16WYC-35	Huke3hao	H2	B
16WYC-44	Yangdao-2	H2	B
16WYC-45	Dangyu-5	H2	B
16WYC-46	Qitoubaigu	H2	B
16WYC-49	Xuanenchangtan	H2	B
16WYC-50	ASD16	H2	B
16WYC-51	Zegu	H2	B
16WYC-54	ASD18	H2	B
16WYC-56	IR72	H2	B
16WYC-59	PSBRC-28	H2	B

## Sheet: S3
Table S3. Primers used in this study
Primer name	Sequence (5'-3')	Target
ID0508-F	CAATTCCAGGATTGGAAAAA	genotyping chr5
ID0508-R	GAGGGGAAGAAGAGATGGAT
ID0904-F	CTCCCCAAACTGAATCC	genotyping chr9
ID0904-R	ACTGCTTTGATGGCTTGTG
M1-F	TAACGTTTGGGTTCGGTTGG	genotyping chr11
M1-R	AAGCCCACCTCCTATACAGC
M2-F	CGGACTGAAACTAGAAGATACG
M2-R	TAGTCTTCACGCCAGTAGTG
M3-F（FA）	GGCGGAAAGGGAGAAGAG
M3-R（FA）	TAGGGACATAGCAAAGCAAAGG
M4-F	TTCTGGTCCGTTGGATTTGA
M4-R	GACGAGTGGTCAAACAGTAC
M5-F	TGTTGTGTGCATGTGAAAGG
M5-R	AGCAATTTCGCTTATCTCAATGT
M6-F	GGCCATGGCTATCTTTTGTC
M6-R	GCATGTTCTCCTCAACTGTC
M7-F	ACACAAGTTAGGAGTGTGGC
M7-R	AACTTATACAGCGAACTGGC
FAD3-1RT-F	TCAATCCATCGAGATCTC	expression
FAD3-1RT-R	GGTGCGTGTCTCCAGCTG
Ubiqutin-F	AACCAGCTGAGGCCCAAGA	expression
Ubiqutin-R	ACGATTGATTTAACCAGTCCATGA
Gt13-F	TATGACCATGATTACGAATTCATGAGTAATGTGTGAGCATTATGGGA	vector construction
Gt13-R	TGCCTGCAGGTCGACTCTAGAATTTGAATGTTAAGATAGAGTTTGT
XFAD3FL1F	GGTACCCGGGGATCCTCTAGATTTCTTGTCTCTTCTCCCTTTC
XFAD3FL1R	ACGACGGCCAGTGCCAAGCTTAGTAGCCCTTGCTGCTTATTAT
GaF0	GATCGTGTCAACATGTGA	genotyping transgenic line
FaR3	GAGGTCGCGGGCGACGTA
